## MATERIALS SCIENCE

# Paving the road toward the use of $\beta$ -Fe<sub>2</sub>O<sub>3</sub> in solar water splitting: Raman identification, phase transformation and strategies for phase stabilization

Ningsi Zhang<sup>1</sup>, Xin Wang<sup>1</sup>, Jianyong Feng<sup>1</sup>, Huiting Huang<sup>1</sup>, Yongsheng Guo<sup>1</sup>, Zhaosheng Li <sup>1,2,\*</sup> and Zhigang Zou<sup>1,2</sup>

## ABSTRACT

Although  $\beta$ -Fe<sub>2</sub>O<sub>3</sub> has a high theoretical solar-to-hydrogen efficiency because of its narrow band gap, the study of  $\beta$ -Fe<sub>2</sub>O<sub>3</sub> photoanodes for water splitting is elusive as a result of their metastable nature. Raman identification of  $\beta$ -Fe<sub>2</sub>O<sub>3</sub> is theoretically and experimentally investigated in this study for the first time, thus clarifying the debate about its Raman spectrum in the literature. Phase transformation of  $\beta$ -Fe<sub>2</sub>O<sub>3</sub> to  $\alpha$ -Fe<sub>2</sub>O<sub>3</sub> was found to potentially take place under laser and electron irradiation as well as annealing. Herein, phase transformation of  $\beta$ -Fe<sub>2</sub>O<sub>3</sub> to  $\alpha$ -Fe<sub>2</sub>O<sub>3</sub> was inhibited by introduction of Zr doping, and  $\beta$ -Fe<sub>2</sub>O<sub>3</sub> was found to withstand a higher annealing temperature without any phase transformation. The solar water splitting photocurrent of the Zr-doped  $\beta$ -Fe<sub>2</sub>O<sub>3</sub> photoanode was increased by 500% compared to that of the pure  $\beta$ -Fe<sub>2</sub>O<sub>3</sub> photoanode. Additionally, Zr-doped  $\beta$ -Fe<sub>2</sub>O<sub>3</sub> exhibited very good stability during the process of solar water splitting. These results indicate that by improving its thermal stability, metastable  $\beta$ -Fe<sub>2</sub>O<sub>3</sub> film is a promising photoanode for solar water splitting.

**Keywords:** solar energy conversion, metastable phase, phase transformation, iron oxide, photoelectrochemical water splitting

## INTRODUCTION

Since the concept of a hydrogen economy was introduced, solar hydrogen production using photoelectrochemical (PEC) or photocatalytic water splitting has occupied a very important position in the artificial utilization of inexhaustible solar energy [1–6]. Solar water splitting for hydrogen production has thereby attracted intensive and ever-increasing interest from many researchers [7–15]. The solar-to-hydrogen efficiency of PEC water splitting reached over 19% using III-V multi-junction semiconductors (including In and Ga) prepared by molecular beam epitaxial growth [16]. Unfortunately, there is a lack of low-cost, environmentally friendly, efficient and stable photoelectrodes for PEC water splitting [17–22], thus hindering application of PEC cells for hydrogen production.

In recent decades, iron-based semiconductors with narrow band gaps (e.g.  $\alpha$ -Fe<sub>2</sub>O<sub>3</sub>) have been considered as promising photoanode materials with

respect to nontoxicity, cost, stability and theoretical solar-to-hydrogen efficiency [23–34]. Recently, a  $\beta$ -Fe<sub>2</sub>O<sub>3</sub> semiconductor with a direct band gap of 1.9 eV was reported by the present authors as a water splitting photoanode under Air Mass 1.5 Global spectrum (AM 1.5 G, 100 mW cm<sup>-2</sup>) illumination [35]. Theoretically, a  $\beta$ -Fe<sub>2</sub>O<sub>3</sub> photoanode for solar water splitting may exhibit a solar-to-hydrogen efficiency of 20.9% because of its narrow band gap of 1.9 eV, whereas its solar photocurrent density is still very low [35]. The phase transformation of metastable  $\beta$ -Fe<sub>2</sub>O<sub>3</sub> to mature  $\alpha$ -Fe<sub>2</sub>O<sub>3</sub> may occur initially at the surface or interface during fabrication of photoanode films because metastable  $\beta$ -Fe<sub>2</sub>O<sub>3</sub> cannot withstand the high temperature of annealing.

Phase identification of  $\beta$ -Fe<sub>2</sub>O<sub>3</sub> is very important to avoid the effects of impurities (e.g.  $\alpha$ -Fe<sub>2</sub>O<sub>3</sub>) during the process of solar water splitting. Phase characterization of inorganic materials is frequently achieved with such methods as X-ray

<sup>1</sup>Collaborative Innovation Center of Advanced Microstructures, National Laboratory of Solid State Microstructures, College of Engineering and Applied Sciences, Nanjing University, Nanjing 210093, China and <sup>2</sup>Jiangsu Key Laboratory of Nano Technology, Nanjing University, Nanjing 210093, China

\*Corresponding author. E-mail: [zqli@nju.edu.cn](mailto:zqli@nju.edu.cn)

Received 15 November 2019;

Revised 11 January 2020; Accepted 8 February 2020

diffraction (XRD), neutron diffraction, electron diffraction, Raman scattering spectroscopy and infrared absorption spectroscopy. Among these methods, Raman spectroscopy is fast and highly sensitive toward material surface structural information. However, Raman spectra of  $\beta$ -Fe<sub>2</sub>O<sub>3</sub> (including Raman peak position and shape) reported in the literature are often contradictory [36,37]. Thus, this study aims to clarify the debates surrounding the Raman spectra of  $\beta$ -Fe<sub>2</sub>O<sub>3</sub>.

The wavelength and power of the excitation laser should be chosen carefully during the process of Raman detection. An appropriate wavelength of laser should be selected to enhance the Raman sensitivity and minimize the fluorescence emission of the samples. It is equally important that the power of the laser be examined cautiously to avoid the influences of thermal effects caused by the laser, especially for those materials with poor thermal stability. For example, phase transformation of  $\varepsilon$ -Fe<sub>2</sub>O<sub>3</sub> and  $\gamma$ -Fe<sub>2</sub>O<sub>3</sub> may take place under laser irradiation [38,39], and  $\beta$ -Fe<sub>2</sub>O<sub>3</sub> may be converted into  $\alpha$ -Fe<sub>2</sub>O<sub>3</sub> upon heat treatment [35,40]. Therefore, low-power laser irradiation is required to avoid phase transformation of the  $\beta$ -Fe<sub>2</sub>O<sub>3</sub> samples.

In this study, the influence of laser wavelength and irradiation power on phase transformation of  $\beta$ -Fe<sub>2</sub>O<sub>3</sub> to  $\alpha$ -Fe<sub>2</sub>O<sub>3</sub> was investigated, and the Raman vibrational spectrum of  $\beta$ -Fe<sub>2</sub>O<sub>3</sub> was clarified. After being doped with Zr, the particle-assembled  $\beta$ -Fe<sub>2</sub>O<sub>3</sub> photoanodes can withstand higher annealing temperatures during the post-treatment process. Therefore, the solar water splitting photocurrent density for the particle-assembled Zr-doped  $\beta$ -Fe<sub>2</sub>O<sub>3</sub> photoanodes was improved significantly to 1.2 mA cm<sup>-2</sup>, which is five times greater than that of pure  $\beta$ -Fe<sub>2</sub>O<sub>3</sub> photoanodes. Thus, this study suggests metastable  $\beta$ -Fe<sub>2</sub>O<sub>3</sub> films as promising photoanode materials for solar water splitting.

## RESULTS AND DISCUSSION

$\beta$ -Fe<sub>2</sub>O<sub>3</sub> belongs to the space group Ia $\bar{3}$ , T<sub>h</sub><sup>7</sup>. Irreducible representations of the  $\Gamma$ -point phonon modes for  $\beta$ -Fe<sub>2</sub>O<sub>3</sub> are shown in Supplementary Table S1. Factor group analysis of  $\beta$ -Fe<sub>2</sub>O<sub>3</sub> predicts 49 phonon modes, 22 and 17 of which are Raman active modes and infrared active modes (Supplementary Table S2), respectively. Some Raman vibrational modes of  $\beta$ -Fe<sub>2</sub>O<sub>3</sub> were observed in previous studies, whereas Rahman and coworkers reported different Raman spectra for  $\beta$ -Fe<sub>2</sub>O<sub>3</sub> [36,37]. To clarify the Raman vibrational modes of  $\beta$ -Fe<sub>2</sub>O<sub>3</sub>, the Raman scatter spectrum of  $\beta$ -Fe<sub>2</sub>O<sub>3</sub> was verified, as shown in Supplementary Fig. S1. Twelve clear vibrational peaks of  $\beta$ -Fe<sub>2</sub>O<sub>3</sub> were observed at 158,

169, 234, 258, 274, 314, 328, 368, 386, 397, 522 and 635 cm<sup>-1</sup> using the 785 nm laser of 0.4 W. These peaks can clearly be distinguished from the Raman vibration peaks of  $\alpha$ -Fe<sub>2</sub>O<sub>3</sub> (227, 246, 293, 300, 411, 499, and 613 cm<sup>-1</sup>). Compared to previous results from Liang and van de Krol [36], four new vibrational peaks at 258, 397, 522 and 635 cm<sup>-1</sup> were observed, whereas the vibrational peak at 208 cm<sup>-1</sup> was not observed.

The theoretical calculations and experimental values of Raman vibrational peaks are listed in Supplementary Table S3. Among the 22 vibrational modes predicted by the theoretical calculations, only 12 significant peaks were observed in the experiments. Three weak vibrational modes are marked with asterisks. The M10 (383 cm<sup>-1</sup>) and M11 (389 cm<sup>-1</sup>) modes merge into one peak (386 cm<sup>-1</sup>) in the experimental spectrum. As given in Supplementary Fig. S1, typical peaks corresponding to vibrational modes 158 cm<sup>-1</sup> (T<sub>g</sub>), 274 cm<sup>-1</sup> (T<sub>g</sub>), 368 cm<sup>-1</sup> (T<sub>g</sub>) and 386 cm<sup>-1</sup> (E<sub>g</sub>+T<sub>g</sub>) can be used as a characteristic spectrum for identifying the phase of  $\beta$ -Fe<sub>2</sub>O<sub>3</sub>. In addition, the theoretically calculated infrared vibrational peaks and the experimental infrared absorption spectrum are also given in Supplementary Table S4 and Supplementary Fig. S2, respectively.

The metastable  $\beta$ -Fe<sub>2</sub>O<sub>3</sub> phase may be converted to the mature  $\alpha$ -Fe<sub>2</sub>O<sub>3</sub> phase upon laser irradiation of different wavelengths and power. Figure 1 shows the effects of laser wavelength on the Raman spectrum of  $\beta$ -Fe<sub>2</sub>O<sub>3</sub>. The Raman peaks at 227, 293, 411, 499 and 613 cm<sup>-1</sup> belonging to  $\alpha$ -Fe<sub>2</sub>O<sub>3</sub> appeared after irradiation of the  $\beta$ -Fe<sub>2</sub>O<sub>3</sub> samples with a 532 nm or 633 nm laser. In the case of 785 nm laser irradiation, the experimental and theoretical Raman peaks for  $\beta$ -Fe<sub>2</sub>O<sub>3</sub> match in shape but exhibit a slight shift. These results suggest that a 785 nm laser is ideal for detecting the Raman spectra of metastable  $\beta$ -Fe<sub>2</sub>O<sub>3</sub>.

Raman spectra mapping images shown in Fig. 2 also indicate phase transformation of the particle-assembled  $\beta$ -Fe<sub>2</sub>O<sub>3</sub> films without any necking treatment, in which the  $\alpha$ -Fe<sub>2</sub>O<sub>3</sub> phase appears when the  $\beta$ -Fe<sub>2</sub>O<sub>3</sub> film samples are irradiated with a 10 mW laser of 532 and 633 nm. Scanning electron microscope (SEM) images also suggest this phase transformation. Even when  $\beta$ -Fe<sub>2</sub>O<sub>3</sub> was irradiated with a laser of 785 nm with 10 mW power, slight damage of the  $\beta$ -Fe<sub>2</sub>O<sub>3</sub> films was observed.

Additionally, the effects of laser power on the Raman spectrum of  $\beta$ -Fe<sub>2</sub>O<sub>3</sub> were investigated. When the power of the 785 nm laser is increased, a phase change of  $\beta$ -Fe<sub>2</sub>O<sub>3</sub> to  $\alpha$ -Fe<sub>2</sub>O<sub>3</sub> possibly occurs (Fig. 3). After  $\beta$ -Fe<sub>2</sub>O<sub>3</sub> is irradiated by 0.4 mW 785 nm laser for an extended period of 500 s, there

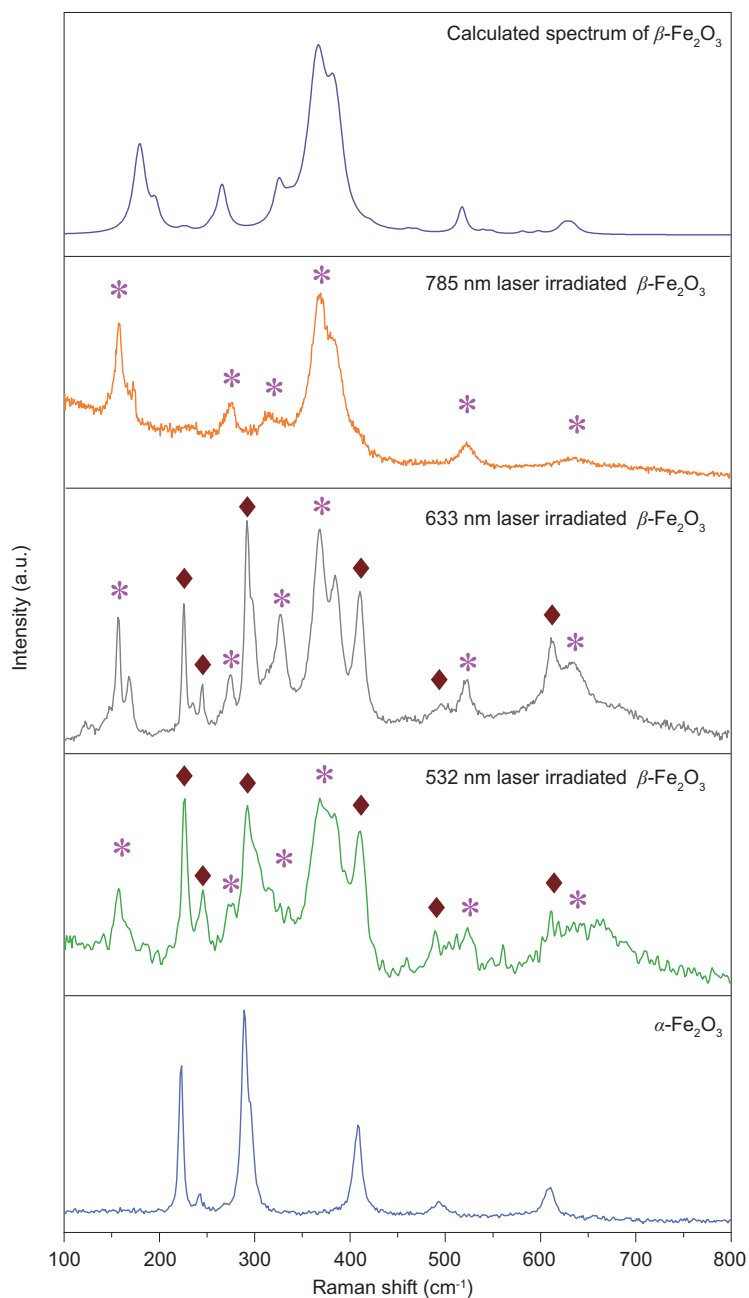

**Figure 1.** Theoretical calculation and experimental measurement of Raman spectra of  $\beta$ - $\text{Fe}_2\text{O}_3$  samples excited by a 0.4 mW laser at 785, 633 and 532 nm. The Raman spectrum of  $\alpha$ - $\text{Fe}_2\text{O}_3$  is listed as a reference.

is no signal corresponding to  $\alpha$ - $\text{Fe}_2\text{O}_3$ . A significant phase transformation occurs with as little as 2 s irradiation with a 4 mW 785 nm laser. As the laser power increases and the exposure time is prolonged, all the  $\beta$ - $\text{Fe}_2\text{O}_3$  gradually converts to  $\alpha$ - $\text{Fe}_2\text{O}_3$ .

Figure 4 shows Raman spectra mapping and SEM images of the particle-assembled  $\beta$ - $\text{Fe}_2\text{O}_3$  films without any necking treatment after laser illumination of 785 nm. When the  $\beta$ - $\text{Fe}_2\text{O}_3$  films were irradiated with 785 nm laser at 0.4 W power, no  $\alpha$ - $\text{Fe}_2\text{O}_3$  signal appeared. With the increasing power of the

785 nm laser, the signals of  $\alpha$ - $\text{Fe}_2\text{O}_3$  were enhanced, suggesting laser-induced phase transformation of  $\beta$ - $\text{Fe}_2\text{O}_3$  to  $\alpha$ - $\text{Fe}_2\text{O}_3$ . The SEM images of Fig. 4 also corroborate this result. The phase transformation of  $\beta$ - $\text{Fe}_2\text{O}_3$  to  $\alpha$ - $\text{Fe}_2\text{O}_3$  is initiated by laser irradiation, likely as a result of the thermal effects of the laser. Therefore, low-power laser irradiation is required to avoid the phase transformation of metastable materials during Raman characterization to minimize its thermal effects. Thus, a 0.4 mW 785 nm laser is ideal for measuring the Raman spectra of  $\beta$ - $\text{Fe}_2\text{O}_3$ .

Figure 5 shows transmission electron microscope (TEM) and selected area electron diffraction (SAED) images of the  $\beta$ - $\text{Fe}_2\text{O}_3$  samples. A simulated SAED image of  $\alpha$ - $\text{Fe}_2\text{O}_3$  is shown in Fig. 5 for comparison. The measured SAED image of  $\beta$ - $\text{Fe}_2\text{O}_3$  samples (Fig. 5a) is in good agreement with the simulated SAED image of  $\alpha$ - $\text{Fe}_2\text{O}_3$  (Fig. 5d) rather than the simulated SAED image of  $\beta$ - $\text{Fe}_2\text{O}_3$  samples (Fig. 5c), suggesting that the phase transformation of  $\beta$ - $\text{Fe}_2\text{O}_3$  to  $\alpha$ - $\text{Fe}_2\text{O}_3$  induced by electron irradiation was also observed in this study. Note that the use of SAED to detect  $\beta$ - $\text{Fe}_2\text{O}_3$  should be done with caution. The phase transformation of  $\beta$ - $\text{Fe}_2\text{O}_3$  to  $\alpha$ - $\text{Fe}_2\text{O}_3$  may be driven by laser irradiation, electron irradiation and heating (Supplementary Figs S3 and S4).

In our previous work, phase transformation of  $\beta$ - $\text{Fe}_2\text{O}_3$  to  $\alpha$ - $\text{Fe}_2\text{O}_3$  occurred after annealing at 650°C [29]. Phase transformation of  $\beta$ - $\text{Fe}_2\text{O}_3$  was also proven by the appearance of the Raman peaks of  $\alpha$ - $\text{Fe}_2\text{O}_3$  (Supplementary Fig. S3). In this study, Zr was introduced into the metastable  $\beta$ - $\text{Fe}_2\text{O}_3$  to inhibit phase transformation of  $\beta$ - $\text{Fe}_2\text{O}_3$  to  $\alpha$ - $\text{Fe}_2\text{O}_3$ . The formation energy of  $\text{Zr}_{0.03}\text{Fe}_{1.97}\text{O}_3$  (Zr-doped  $\beta$ - $\text{Fe}_2\text{O}_3$ ) was calculated as  $-0.16$  eV relative to pure  $\beta$ - $\text{Fe}_2\text{O}_3$ , suggesting that Zr can be doped into the lattice of  $\beta$ - $\text{Fe}_2\text{O}_3$  to form a more stable structure. The density of states (DOS) for  $\text{Zr}_{0.03}\text{Fe}_{1.97}\text{O}_3$  indicates that the band gap of  $\beta$ - $\text{Fe}_2\text{O}_3$  does not change obviously by doping Zr (Supplementary Fig. S5).

The XRD pattern of Zr-doped  $\beta$ - $\text{Fe}_2\text{O}_3$  (Supplementary Fig. S6) is in good agreement with  $\beta$ - $\text{Fe}_2\text{O}_3$  (JCPDS#39-0238), suggesting that there is no impurity phase after doping with Zr. The X-ray photoelectron spectroscopy with Supplementary Fig. S7 shows that Zr was doped into the sample. The absorption spectra of pure  $\beta$ - $\text{Fe}_2\text{O}_3$  and Zr-doped  $\beta$ - $\text{Fe}_2\text{O}_3$  are shown in Supplementary Fig. S8. After annealing, the band gap of pure  $\beta$ - $\text{Fe}_2\text{O}_3$  changed, whereas the band gap of Zr-doped  $\beta$ - $\text{Fe}_2\text{O}_3$  did not. In previous work, we have reported that the absorption spectrum of  $\beta$ - $\text{Fe}_2\text{O}_3$  varies after different calcining processes [35]. The change in band gap indicates that a phase transformation may

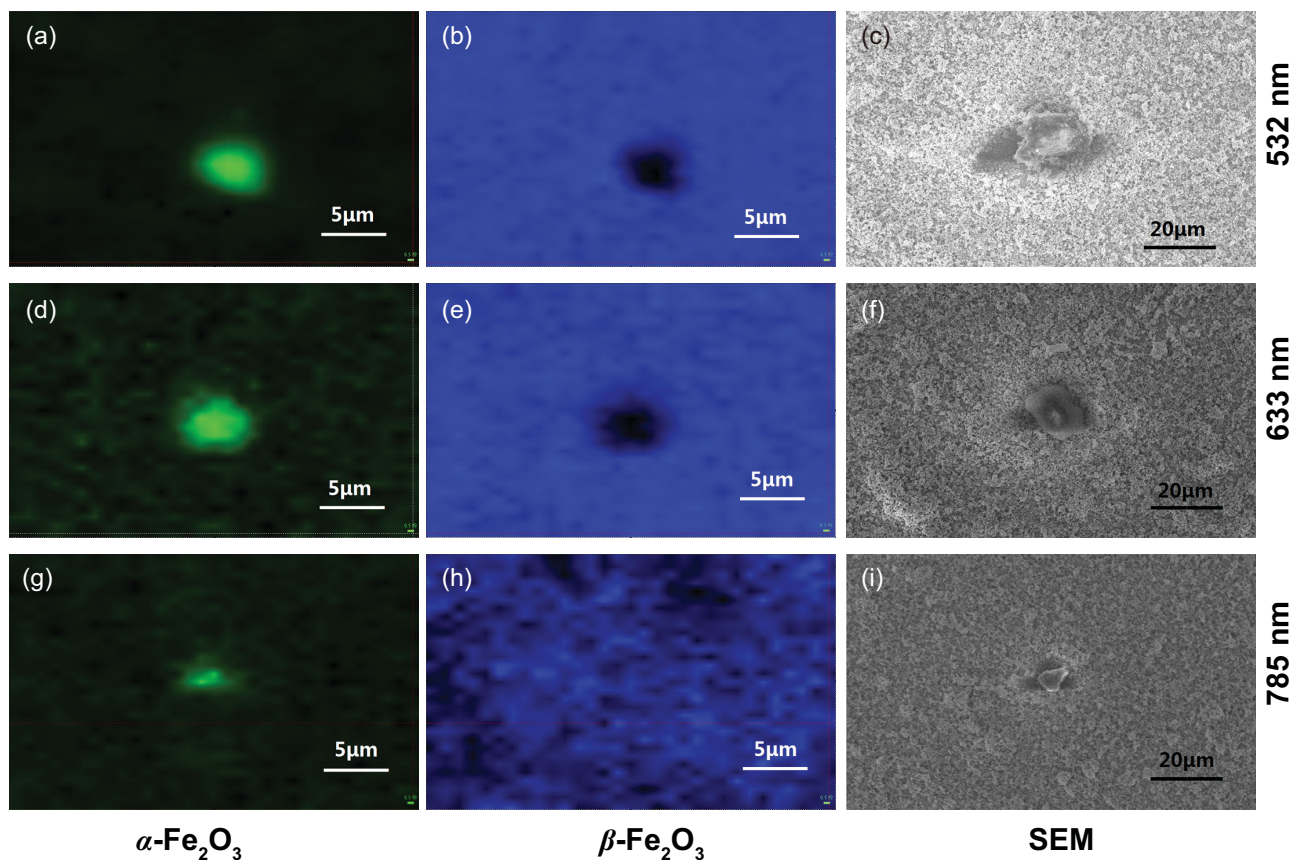

**Figure 2.** Raman mapping and SEM images of particle-assembled  $\beta\text{-Fe}_2\text{O}_3$  films excited by a 0.4 mW laser at 785 nm after irradiation by a 10 mW laser with various wavelengths: (a-c) 532 nm, (d-f) 633 nm and (g-i) 785 nm. (a, d, g)  $\alpha\text{-Fe}_2\text{O}_3$ ; (b, e, h)  $\beta\text{-Fe}_2\text{O}_3$ .

occur. Indeed, after being annealed at 1023 K, the characteristic Raman peaks of  $\alpha\text{-Fe}_2\text{O}_3$  appeared in the Raman spectrum of the  $\beta\text{-Fe}_2\text{O}_3$  sample (Supplementary Fig. S9a), indicating that there was a phase transformation. The Raman spectra of Zr-doped  $\beta\text{-Fe}_2\text{O}_3$  did not change after being annealed at 1023 K (Supplementary Fig. S9b), indicating that there was no phase transformation. Note that the results of differential scanning calorimetry show that the phase transition temperature of Zr-doped  $\beta\text{-Fe}_2\text{O}_3$  is clearly increased, as shown in Supplementary Fig. S10. The above results show that Zr doping effectively increases the phase transition temperature of metastable iron oxide.

SEM images of the particle-assembled  $\beta\text{-Fe}_2\text{O}_3$  photoanodes with and without Zr doping are shown in Supplementary Fig. S11. Figure 6a shows a comparison of the PEC performances of the particle-assembled  $\beta\text{-Fe}_2\text{O}_3$  photoanodes with and without Zr doping under AM 1.5 G irradiation ( $100 \text{ mW cm}^{-2}$ ). The results show that the photocurrent of Zr-doped  $\beta\text{-Fe}_2\text{O}_3$  photoanodes is much higher than that of pure  $\beta\text{-Fe}_2\text{O}_3$  photoanodes. Zr-doped  $\beta\text{-Fe}_2\text{O}_3$  photoanodes also exhibit much larger monochromatic incident

photon-to-electron conversion efficiency (IPCE) than pure  $\beta\text{-Fe}_2\text{O}_3$  photoanodes (Fig. 6b). Compared to the pure  $\beta\text{-Fe}_2\text{O}_3$ , the carrier density of Zr-doped  $\beta\text{-Fe}_2\text{O}_3$  has been improved from  $1.8 \times 10^{20}$  to  $4.6 \times 10^{20} \text{ cm}^{-3}$ , which can be estimated from the Supplementary Fig. S12a. As shown in Supplementary Fig. S12b, the charge separation efficiency of Zr-doped  $\beta\text{-Fe}_2\text{O}_3$  is improved by approximately four times at 1.6 V versus Reversible Hydrogen Electrode (RHE), compared to that of  $\beta\text{-Fe}_2\text{O}_3$ . The increase in the carrier concentration may favor the charge transport and contribute to the improvement in water splitting photocurrent of the Zr-doped  $\beta\text{-Fe}_2\text{O}_3$  photoanode.

Under AM 1.5 G irradiation ( $100 \text{ mW cm}^{-2}$ ), both Zr-doped and pure  $\beta\text{-Fe}_2\text{O}_3$  photoanodes exhibit very good photochemical stability for water splitting during the PEC reaction over 10 h, as shown in Fig. 6c. In the case of particle-assembled Zr-doped  $\beta\text{-Fe}_2\text{O}_3$  photoanodes, the Faradaic efficiencies for hydrogen production and oxygen production are 85% and 80%, respectively (Fig. 6d). This result suggests that the photocurrent of the particle-assembled  $\beta\text{-Fe}_2\text{O}_3$  photoanodes is mainly attributed to water splitting.

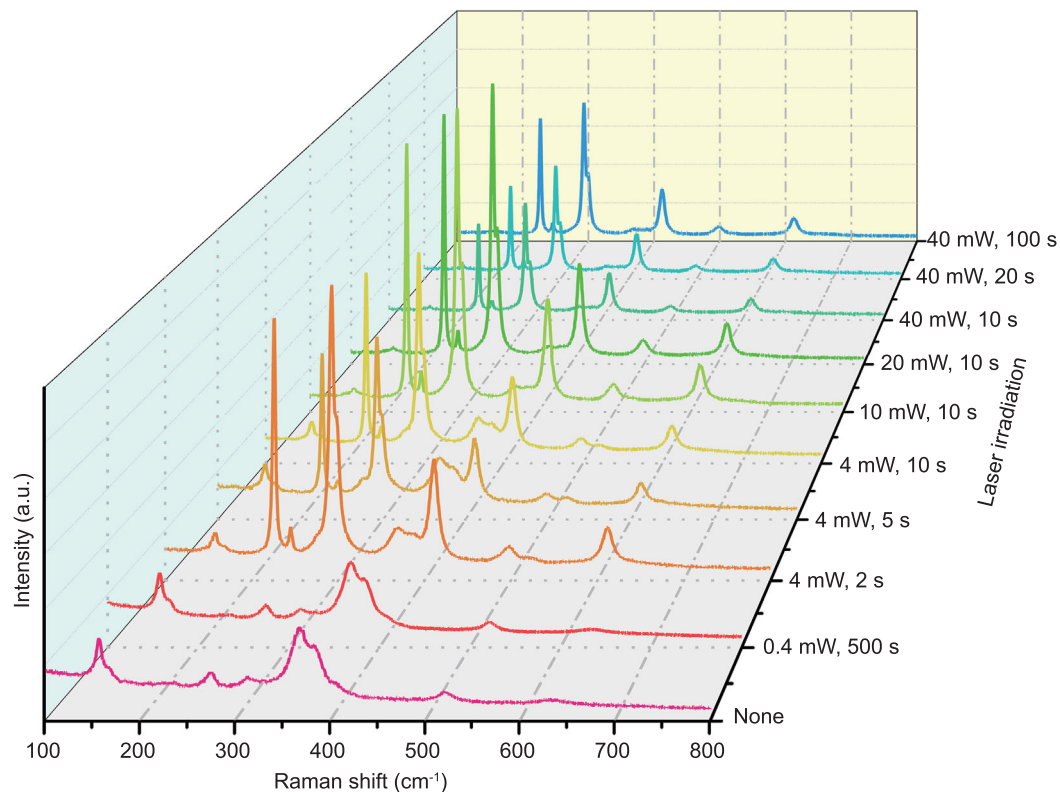

**Figure 3.** Raman spectra of  $\beta$ -Fe<sub>2</sub>O<sub>3</sub> under different power laser irradiations of 785 nm.

During the process of solar water splitting,  $\beta$ -Fe<sub>2</sub>O<sub>3</sub> as a photoanode material may be exposed to standard simulated sunlight for a long time. To assess the possibility for phase transformation of  $\beta$ -Fe<sub>2</sub>O<sub>3</sub> to  $\alpha$ -Fe<sub>2</sub>O<sub>3</sub> under simulated sunlight, the Raman spectra of the samples were measured before and after the photochemical stability testing. As shown in Supplementary Fig. S13, the phase of the  $\beta$ -Fe<sub>2</sub>O<sub>3</sub> photoanodes before and after the reaction of PEC water splitting remains unchanged. In a typical PEC reaction, the intensity of the light used is not sufficient to promote the phase transformation of  $\beta$ -Fe<sub>2</sub>O<sub>3</sub> particle-assembled films. Therefore,  $\beta$ -Fe<sub>2</sub>O<sub>3</sub> is a promising photoanode for water splitting. The PEC performance of  $\beta$ -Fe<sub>2</sub>O<sub>3</sub> may be improved further by not only the rational design of electrocatalysts but also the optimization of preparation methods [41,42].

## CONCLUSION

In conclusion, the Raman spectrum of  $\beta$ -Fe<sub>2</sub>O<sub>3</sub> under excitation by a 785 nm laser with 0.4 W power shows 12 significant vibrational modes corresponding to  $\beta$ -Fe<sub>2</sub>O<sub>3</sub>. The phase transformation of metastable  $\beta$ -Fe<sub>2</sub>O<sub>3</sub> to mature  $\alpha$ -Fe<sub>2</sub>O<sub>3</sub> may be observed under laser irradiation, electron irradiation

and heating. Zr doping was introduced to particle-assembled  $\beta$ -Fe<sub>2</sub>O<sub>3</sub> films, thus not only increasing the carrier concentration but also suppressing the phase transformation of  $\beta$ -Fe<sub>2</sub>O<sub>3</sub>. The PEC performance of the Zr-doped  $\beta$ -Fe<sub>2</sub>O<sub>3</sub> photoanode was vastly boosted, in comparison with that of the pure  $\beta$ -Fe<sub>2</sub>O<sub>3</sub> photoanode. This study demonstrates that metastable  $\beta$ -Fe<sub>2</sub>O<sub>3</sub> remains stable during the PEC reaction and is a promising photoanode material for decomposing water, thus paving the road toward the use of  $\beta$ -Fe<sub>2</sub>O<sub>3</sub> in solar water splitting (Supplementary Scheme S1).

## METHODS

In this study,  $\beta$ -Fe<sub>2</sub>O<sub>3</sub> powder was synthesized by calcining the mixture of NaFe(SO<sub>4</sub>)<sub>2</sub> (or 1.5% ZrSO<sub>4</sub> doped NaFe(SO<sub>4</sub>)<sub>2</sub>) and NaCl in a muffle furnace at 450°C for 1 h [43]. As-prepared  $\beta$ -Fe<sub>2</sub>O<sub>3</sub> powder was then deposited on fluorine-doped tin oxide (FTO) glass by electrophoretic deposition to prepare the particle-assembled films. In the case of necking treatment for the particle-assembled  $\beta$ -Fe<sub>2</sub>O<sub>3</sub> films, 0.2  $\mu$ mol of TiCl<sub>4</sub> in methanol solution was dropped on the particle-assembled  $\beta$ -Fe<sub>2</sub>O<sub>3</sub> films. Afterward, the

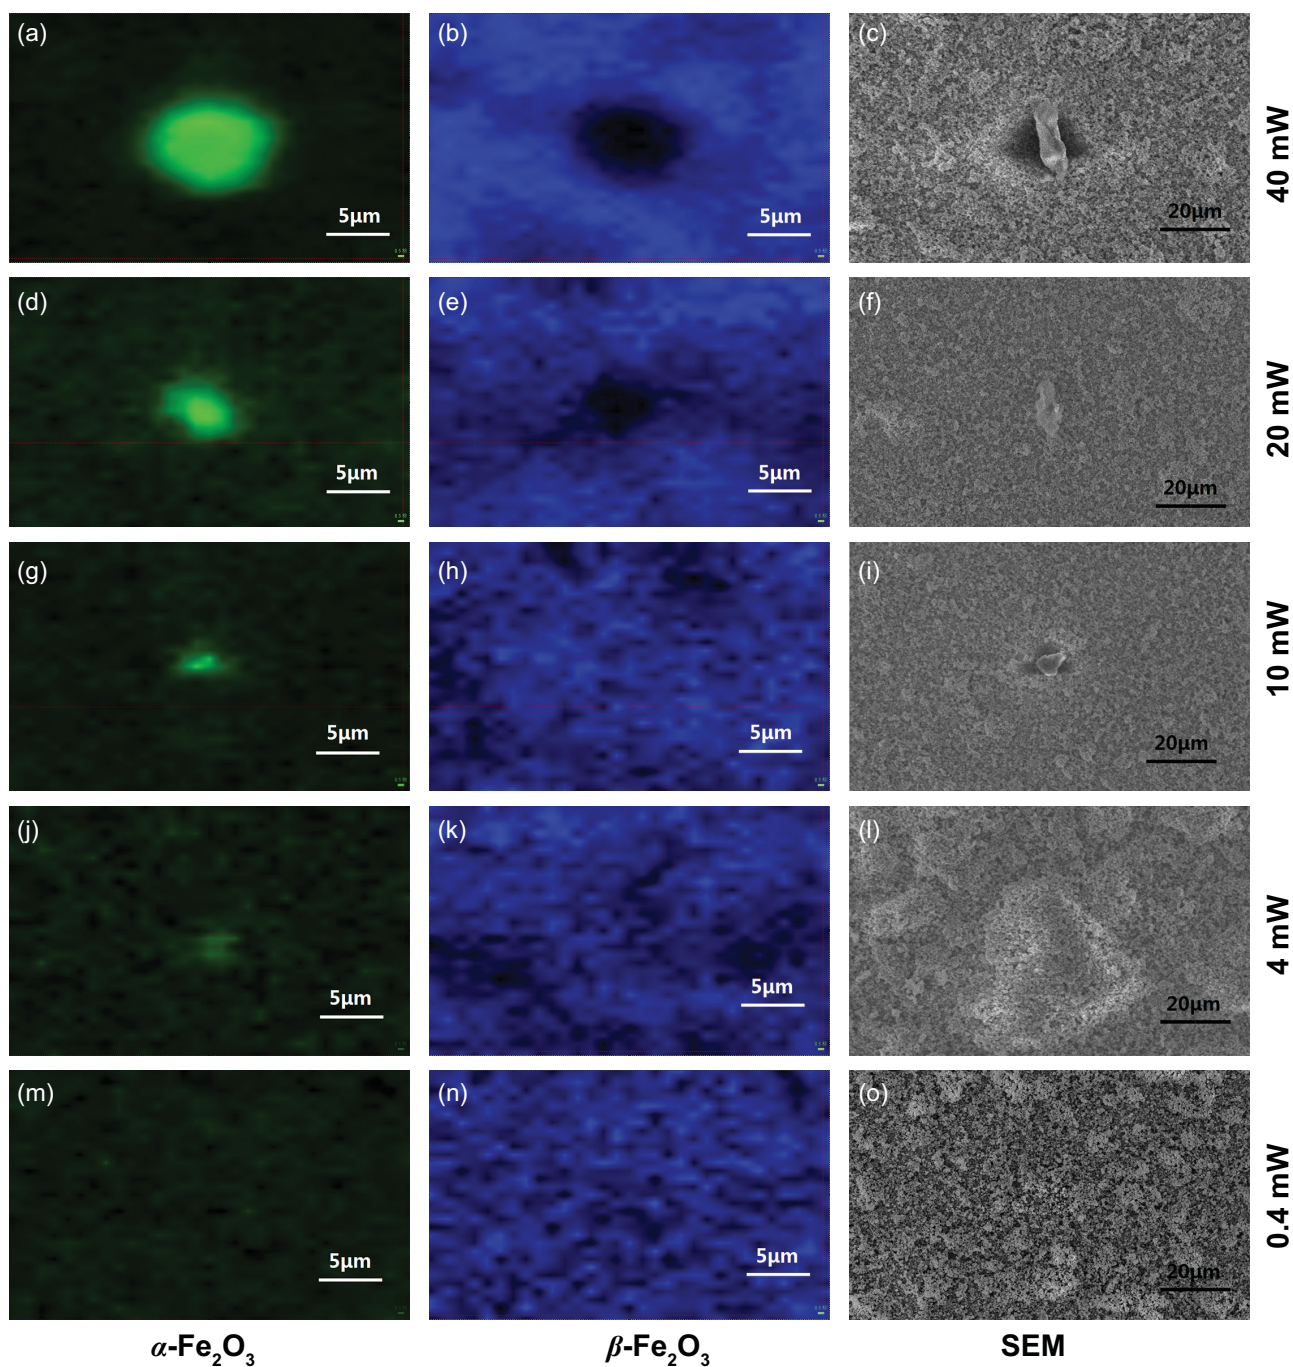

**Figure 4.** Raman mapping and SEM images of particle-assembled  $\beta$ - $\text{Fe}_2\text{O}_3$  films excited by a 0.4 mW laser of 785 nm after the irradiation of 785 nm laser with various power: (a-c) 40 mW, (d-f) 20 mW, (g-i) 10 mW, (j-l) 4 mW and (m-o) 0.4 mW. (a, d, g, j, m)  $\alpha$ - $\text{Fe}_2\text{O}_3$ ; (b, e, h, k, n)  $\beta$ - $\text{Fe}_2\text{O}_3$ .

films were annealed in a muffle furnace at 600°C (or 650°C) for 1 h.

Raman spectra of the samples were characterized with a confocal laser Raman spectrometer (Japan, Horiba, LabRAM Aramis, calibrated with silicon). Except for Fig. 1, all of the Raman spectra data acquisition used a 785 nm laser as the excitation source. Except for Fig. 3, all of the Raman spectra data acquisition used a 0.4 mW power

laser as the excitation source. Raman imaging was obtained using a 785 nm, 0.4 mW laser. All laser-induced phase-change samples were confirmed using a 785 nm laser as the excitation source before laser irradiation to ensure that the samples contained no  $\alpha$ - $\text{Fe}_2\text{O}_3$ . The phosphor spectrum calculations were calculated in Material Studio with the Local Density Approximate, using the norm-conserving situation.

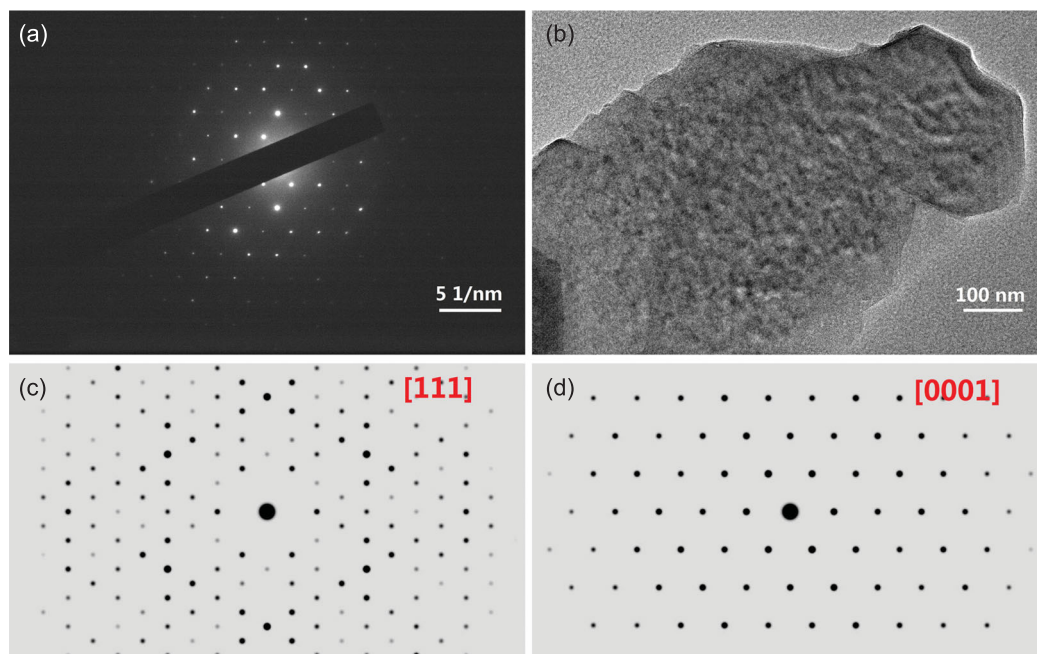

**Figure 5.** SAED and TEM images of the samples. (a) Measured SAED image of the  $\beta$ - $\text{Fe}_2\text{O}_3$  sample. (b) TEM image of the  $\beta$ - $\text{Fe}_2\text{O}_3$  sample. (c) Simulated SAED image of  $\beta$ - $\text{Fe}_2\text{O}_3$ . (d) Simulated SAED image of  $\alpha$ - $\text{Fe}_2\text{O}_3$ .

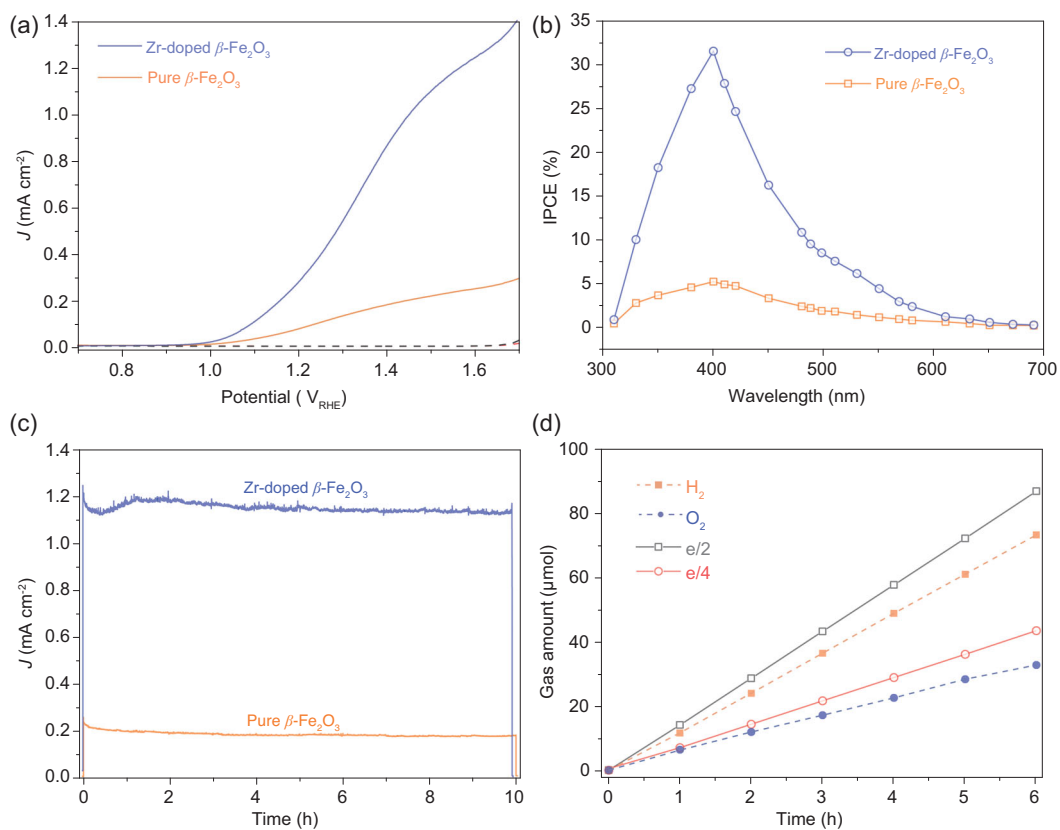

**Figure 6.** (a) Photocurrent density, (b) IPCE, (c) photochemical stability at  $1.6 \text{ V}_{\text{RHE}}$  and (d) Faradic efficiencies of the particle-assembled  $\beta$ - $\text{Fe}_2\text{O}_3$  films with Zr doping under illumination of standard simulated sunlight ( $100 \text{ mW cm}^{-2}$ ) in  $1 \text{ M NaOH}$  electrolyte ( $\text{pH} = 13.6$ ). Reference sample:  $\alpha$ - $\text{Fe}_2\text{O}_3$ .

Density functional theory calculations on Zr-doped  $\beta$ -Fe<sub>2</sub>O<sub>3</sub> were implemented in the VASP (Vienna Ab-initio Simulation Package) with a projected-augmented-wave method in the scheme of generalized-gradient approximation, whereas the strong on-site Coulomb repulsion among the localized Fe 3d electrons was described with the generalized-gradient approximation +U approach ('U' is 'the strength of the on-site Coulomb interaction').

SEM images were obtained on an SEM (Germany, Zeiss, Ultra 55) and SAED images of the samples were obtained on a TEM (Japan, JEOL, Ltd. JEM2100).

PEC water splitting of the  $\beta$ -Fe<sub>2</sub>O<sub>3</sub> particle-assembled films was carried out in 1 M NaOH solution (pH = 13.6) under AM 1.5 G standard simulated sunlight (American, Newport, Oriel Sol3A, 100 mW cm<sup>-2</sup>).

## SUPPLEMENTARY DATA

Supplementary data are available at [NSR](#) online.

## ACKNOWLEDGEMENTS

The characterizations were made at the Collaborative Innovation Center of Advanced Microstructures in Nanjing University. The numerical calculations were conducted thanks to the access to the IBM Blade cluster system at the High Performance Computing Center (HPCC) of Nanjing University.

## FUNDING

This work was supported by the National Key Research and Development Program of China (2018YFA0209303), the National Natural Science Foundation of China (U1663228, 51902153 and 51972165) and a project funded by the Priority Academic Program Development of Jiangsu Higher Education Institutions.

**Conflict of interest statement.** None declared.

## REFERENCES

- Notzel R. InN/InGaN quantum dot electrochemical devices: new solutions for energy and health. *Natl Sci Rev* 2017; **4**: 184–95.
- Li Z, Luo W and Zhang M *et al.* Photoelectrochemical cells for solar hydrogen production: current state of promising photoelectrodes, methods to improve their properties, and outlook. *Energy Environ Sci* 2013; **6**: 347–70.
- Han H and Li C. Photocatalysis in solar fuel production. *Natl Sci Rev* 2015; **2**: 145–7.
- Young JL, Steiner MA and Döscher H *et al.* Direct solar-to-hydrogen conversion via inverted metamorphic multi-junction semiconductor architectures. *Nat Energy* 2017; **2**: 17028.
- Yang Y, Niu S and Han D *et al.* Progress in developing metal oxide nanomaterials for photoelectrochemical water splitting. *Adv Energy Mater* 2017; **7**: 1700555.
- Pan L, Kim JH and Mayer MT *et al.* Boosting the performance of Cu<sub>2</sub>O photocathodes for unassisted solar water splitting devices. *Nat Catal* 2018; **1**: 412–20.
- Feng J, Huang H and Fang T *et al.* Defect engineering in semiconductors: manipulating nonstoichiometric defects and understanding their impact in oxynitrides for solar energy conversion. *Adv Funct Mater* 2019; **29**: 1808389.
- Warren SC, Voitchovsky K and Dotan H *et al.* Identifying champion nanostructures for solar water-splitting. *Nat Mater* 2013; **12**: 842–9.
- Li Z, Feng J and Yan S *et al.* Solar fuel production: strategies and new opportunities with nanostructures. *Nano Today* 2015; **10**: 468–86.
- Pendlebury SR, Wang X and Le Formal F *et al.* Ultrafast charge carrier recombination and trapping in hematite photoanodes under applied bias. *J Am Chem Soc* 2014; **136**: 9854–7.
- Sivula K and Van De Krol R. Semiconducting materials for photoelectrochemical energy conversion. *Nat Rev Mater* 2016; **1**: 15010.
- Walter MG, Warren EL and McKone JR *et al.* Solar water splitting cells. *Chem Rev* 2010; **110**: 6446–73.
- Kment S, Riboni F and Pausova S *et al.* Photoanodes based on TiO<sub>2</sub> and  $\alpha$ -Fe<sub>2</sub>O<sub>3</sub> for solar water splitting—superior role of 1D nanoarchitectures and of combined heterostructures. *Chem Soc Rev* 2017; **46**: 3716–69.
- Le Formal F, Pastor E and Tilley SD *et al.* Rate law analysis of water oxidation on a hematite surface. *J Am Chem Soc* 2015; **137**: 6629–37.
- Zhu Y, Qian Q and Fan G *et al.* Insight into the influence of high temperature annealing on the onset potential of Ti-doped hematite photoanodes for solar water splitting. *Chin Chem Lett* 2018; **29**: 791–4.
- Cheng W, Richter MH and May MM *et al.* Monolithic photoelectrochemical device for direct water splitting with 19% efficiency. *ACS Energy Lett* 2018; **3**: 1795–800.
- Klahr B, Gimenez S and Fabregat-Santiago F *et al.* Electrochemical and photoelectrochemical investigation of water oxidation with hematite electrodes. *Energy Environ Sci* 2012; **5**: 7626–36.
- Klahr B, Gimenez S and Fabregat-Santiago F *et al.* Water oxidation at hematite photoelectrodes: the role of surface states. *J Am Chem Soc* 2012; **134**: 4294–302.
- Zhao X, Feng J and Wang N *et al.* The influence of Ti doping on morphology and photoelectrochemical properties of hematite grown from aqueous solution for water splitting. *Energy Technol* 2018; **6**: 2188–99.
- Liang Q, Guo Y and Zhang N *et al.* Improved water-splitting performances of CuW<sub>1-x</sub>Mo<sub>x</sub>O<sub>4</sub> photoanodes synthesized by spray pyrolysis. *Sci China Mater* 2018; **61**: 1297–304.
- Fang T, Huang H and Feng J *et al.* Exploring facile strategies for high-oxidation-state metal nitride synthesis: carbonate-assisted one-step synthesis of Ta<sub>3</sub>N<sub>5</sub> films for solar water splitting. *Sci Bull* 2018; **63**: 1404–10.



22. Chen Q, Fan G and Fu H *et al.* Tandem photoelectrochemical cells for solar water splitting. *Adv Phys X* 2018; **3**: 1487267.
23. Wang Z, Mao X and Chen P *et al.* Understanding the roles of oxygen vacancies in hematite-based photoelectrochemical processes. *Angew Chem* 2019; **131**: 1042–6.
24. Xu YF, Wang XD and Chen HY *et al.* Toward high performance photoelectrochemical water oxidation: combined effects of ultrafine cobalt iron oxide nanoparticle. *Adv Funct Mater* 2016; **26**: 4414–21.
25. Qiu Y, Leung SF and Zhang Q *et al.* Efficient photoelectrochemical water splitting with ultrathin films of hematite on three-dimensional nanophotonic structures. *Nano Lett* 2014; **14**: 2123–9.
26. Marelli M, Naldoni A and Minguzzi A *et al.* Hierarchical hematite nanoplatelets for photoelectrochemical water splitting. *ACS Appl Mater Interfaces* 2014; **6**: 11997–2004.
27. Hou Y, Zuo F and Dagg A *et al.* Visible light-driven  $\alpha$ -Fe<sub>2</sub>O<sub>3</sub> nanorod/graphene/BiV<sub>1-x</sub>Mo<sub>x</sub>O<sub>4</sub> core/shell heterojunction array for efficient photoelectrochemical water splitting. *Nano Lett* 2012; **12**: 6464–73.
28. Wang L, Nguyen NT and Huang X *et al.* Hematite photoanodes: synergistic enhancement of light harvesting and charge management by sandwiched with Fe<sub>2</sub>TiO<sub>5</sub>/Fe<sub>2</sub>O<sub>3</sub>/Pt structures. *Adv Funct Mater* 2017; **27**: 1703527.
29. Hufnagel AG, Hajiyan H and Zhang S *et al.* Why tin-doping enhances the efficiency of hematite photoanodes for water splitting—the full picture. *Adv Funct Mater* 2018; **28**: 1804472.
30. Malviya KD, Dotan H and Shlenkevich D *et al.* Systematic comparison of different dopants in thin film hematite ( $\alpha$ -Fe<sub>2</sub>O<sub>3</sub>) photoanodes for solar water splitting. *J Mater Chem A* 2016; **4**: 3091–9.
31. Malara F, Fabbri F and Marelli M *et al.* Controlling the surface energetics and kinetics of hematite photoanodes through few atomic layers of NiO<sub>x</sub>. *ACS Catal* 2016; **6**: 3619–28.
32. Wang CW, Yang S and Fang WQ *et al.* Engineered hematite mesoporous single crystals drive drastic enhancement in solar water splitting. *Nano Lett* 2015; **16**: 427–33.
33. Sabba D, Kumar MH and Wong LH *et al.* Perovskite–hematite tandem cells for efficient overall solar driven water splitting. *Nano Lett* 2015; **15**: 3833–9.
34. Sun Y, Chemelewski WD and Berglund SP *et al.* Antimony-doped tin oxide nanorods as a transparent conducting electrode for enhancing photoelectrochemical oxidation of water by hematite. *ACS Appl Mater Interfaces* 2014; **6**: 5494–9.
35. Zhang N, Guo Y and Wang X *et al.* A beta-Fe<sub>2</sub>O<sub>3</sub> nanoparticle-assembled film for photoelectrochemical water splitting. *Dalton Trans* 2017; **46**: 10673–7.
36. Liang Y and van de Krol R. Influence of Si dopant and SnO<sub>2</sub> interfacial layer on the structure of the spray-deposited Fe<sub>2</sub>O<sub>3</sub> films. *Chem Phys Lett* 2009; **479**: 86–90.
37. Rahman MM, Jamal A and Khan SB *et al.* Fabrication of chloroform sensor based on hydrothermally prepared low-dimensional  $\beta$ -Fe<sub>2</sub>O<sub>3</sub> nanoparticles. *Superlattices Microstruct* 2011; **50**: 369–76.
38. López-Sánchez J, Serrano A and Del Campo A *et al.* Sol–gel synthesis and micro-Raman characterization of  $\epsilon$ -Fe<sub>2</sub>O<sub>3</sub> micro- and nanoparticles. *Chem Mater* 2016; **28**: 511–8.
39. El Mendili Y, Bardeau JF and Randrianantoandro N *et al.* Insights into the mechanism related to the phase transition from  $\gamma$ -Fe<sub>2</sub>O<sub>3</sub> to  $\alpha$ -Fe<sub>2</sub>O<sub>3</sub> nanoparticles induced by thermal treatment and laser irradiation. *J Phys Chem C* 2012; **116**: 23785–92.
40. Danno T, Nakatsuka D and Kusano Y *et al.* Crystal structure of  $\beta$ -Fe<sub>2</sub>O<sub>3</sub> and topotactic phase transformation to  $\alpha$ -Fe<sub>2</sub>O<sub>3</sub>. *Cryst Growth Des* 2013; **13**: 770–4.
41. Hu Y, Wu Y and Feng J *et al.* Rational design of electrocatalysts for simultaneously promoting bulk charge separation and surface charge transfer in solar water splitting photoelectrodes. *J Mater Chem A* 2018; **6**: 2568–76.
42. Fang T, Huang H and Feng J *et al.* Reactive inorganic vapor deposition of perovskite oxynitride films for solar energy conversion. *Research* 2019; **2019**: 9282674.
43. Danno T, Asoka H and Nakanishi M *et al.* Formation mechanism of nanocrystalline  $\beta$ -Fe<sub>2</sub>O<sub>3</sub> particles with bixbyite structure and their magnetic properties. *J Phys Conf Ser* 2010; **200**: 082003.
